# Supplementary material
Source: PubMed Central journal article supplement (PMC4762736)
Supplement: NIHMS727876-supplement-Supplemental_Data_Files.pdf [file NIHMS727876-supplement-Supplemental_Data_Files.pdf]

**Appendix**  
**Prevalence and Characteristics of Sexual Violence Against Men With Disabilities**  
**Mitra et al.**

**Appendix Table 1.** Demographic Characteristics by Disability and Gender

|                                    | <b>Men with<br/>disabilities<br/>n=15,960<br/>% (95% CI)</b> | <b>Men without<br/>disabilities<br/>n=52,504<br/>% (95% CI)</b> | <b>Women with<br/>disabilities<br/>n=25,963<br/>% (95% CI)</b> | <b>Women without<br/>disabilities<br/>n=78,725<br/>% (95% CI)</b> |
|------------------------------------|--------------------------------------------------------------|-----------------------------------------------------------------|----------------------------------------------------------------|-------------------------------------------------------------------|
| <b>Age (years)</b>                 |                                                              |                                                                 |                                                                |                                                                   |
| 18-34                              | 16.8<br>(15.3-18.3)                                          | 36.5<br>(35.6-37.4)                                             | 16.0<br>(14.8-17.1)                                            | 34.6<br>(33.9-35.2)                                               |
| 35-54                              | 36.2<br>(34.8-37.7)                                          | 39.4<br>(38.7-40.2)                                             | 35.6<br>(34.5-36.6)                                            | 39.3<br>(38.6-39.9)                                               |
| 55+                                | 46.9<br>(45.5-48.4)                                          | 24.0<br>(23.4-24.6)                                             | 48.5<br>(47.3-49.6)                                            | 26.2<br>(25.7-26.7)                                               |
| <b>Race/ethnicity</b>              |                                                              |                                                                 |                                                                |                                                                   |
| White, non-Hispanic                | 74.8<br>(73.4-76.2)                                          | 71.3<br>(70.5-72.1)                                             | 75.4<br>(74.3-76.5)                                            | 71.1<br>(70.5-71.7)                                               |
| Hispanic                           | 11.1<br>(10.0-12.2)                                          | 14.6<br>(13.9-15.3)                                             | 10.7<br>(9.9-11.6)                                             | 14.4<br>(13.9-14.9)                                               |
| Other, non-Hispanic                | 14.1<br>(13.1-15.2)                                          | 14.0<br>(13.4-14.7)                                             | 13.8<br>(13.0-14.6)                                            | 14.5<br>(14.0-15.0)                                               |
| <b>Marital status</b>              |                                                              |                                                                 |                                                                |                                                                   |
| Married or in a couple             | 67.7<br>(66.3-69.1)                                          | 67.8<br>(67.0-68.7)                                             | 54.3<br>(53.1-55.4)                                            | 65.0<br>(64.4-65.6)                                               |
| Widowed, divorced, or<br>separated | 17.3<br>(16.4-18.3)                                          | 10.3<br>(9.9-10.7)                                              | 34.4<br>(33.4-35.4)                                            | 18.2<br>(17.8-18.6)                                               |
| Never married and single           | 14.9<br>(13.6-16.3)                                          | 21.8<br>(21.0-22.7)                                             | 11.3<br>(10.3-12.2)                                            | 16.8<br>(16.2-17.3)                                               |
| <b>Education</b>                   |                                                              |                                                                 |                                                                |                                                                   |
| HS Grad, GED or less               | 43.2<br>(41.7-44.7)                                          | 38.1<br>(37.3-39.0)                                             | 45.6<br>(44.4-46.7)                                            | 36.9<br>(36.2-37.5)                                               |
| Some college/tech school           | 27.5<br>(26.2-28.9)                                          | 25.9<br>(25.2-26.7)                                             | 29.7<br>(28.6-30.7)                                            | 29.2<br>(28.6-29.8)                                               |
| 4 year degree or more              | 29.3<br>(27.8-30.6)                                          | 35.9<br>(35.1-36.7)                                             | 24.7<br>(23.7-25.7)                                            | 33.9<br>(33.3-34.5)                                               |
| <b>Employment</b>                  |                                                              |                                                                 |                                                                |                                                                   |
| Employed                           | 46.6<br>(45.1-48.1)                                          | 77.8<br>(77.2-78.5)                                             | 34.9<br>(33.8-36.0)                                            | 61.6<br>(61.0-62.3)                                               |
| Not working, any reason            | 53.4<br>(51.8-54.9)                                          | 22.2<br>(21.5-22.8)                                             | 65.1<br>(64.0-66.2)                                            | 38.3<br>(37.7-39.0)                                               |
